# Supplementary material for: Circulating proteins associated with allergy development in infants—an exploratory analysis
Source: PubMed Central journal article supplement (PMC7958444; doi:10.1186/s12014-021-09318-w), 2021-03-15

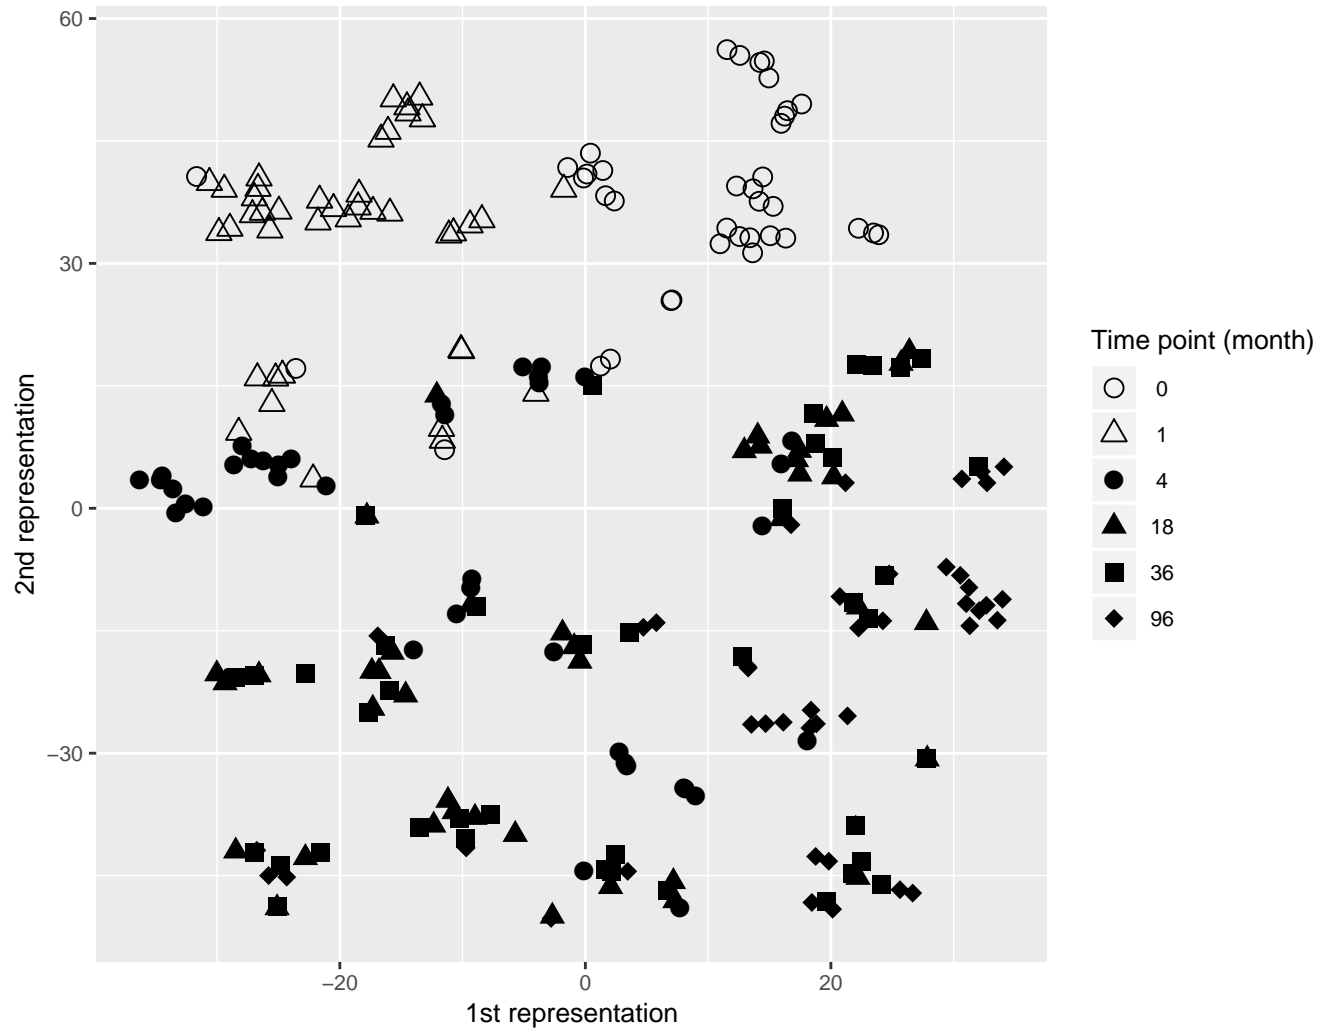

Supplement: 12014_2021_9318_MOESM1_ESM.pdf [file 12014_2021_9318_MOESM1_ESM.pdf]
